# Supplementary material
Source: PubMed Central journal article supplement (PMC4667129)
Supplement: mmc1.pdf [file mmc1.pdf]

The American Journal of Human Genetics

Supplemental Data

**Association between Rare Variants in *AP4E1*,  
a Component of Intracellular Trafficking,  
and Persistent Stuttering**

M. Hashim Raza, Rafael Mattera, Robert Morell, Eduardo Sainz, Rachel Rahn, Joanne Gutierrez, Emily Paris, Jessica Root, Beth Solomon, Carmen Brewer, M. Asim Raza Basra, Shaheen Khan, Sheikh Riazuddin, Allen Braun, Juan S. Bonifacino, and Dennis Drayna

## Figure S1

Sequence conservation of Valine V517 and Glutamic acid E801 across different species.

| Intron       |   |   |   |   | Part of Exon 14 |      |      |      |      |      |
|--------------|---|---|---|---|-----------------|------|------|------|------|------|
| AP4E1        |   |   |   |   | V517            | L518 | G519 | E520 | Y521 | S522 |
| Human        | A | C | A | G | V               | L    | G    | E    | Y    | S    |
| Mouse        | C | T | A | G | V               | L    | G    | E    | Y    | S    |
| Dog          | A | T | A | G | V               | L    | G    | E    | Y    | S    |
| Elephant     | A | T | A | G | V               | L    | G    | E    | Y    | S    |
| Opossum      | A | C | A | G | V               | L    | G    | E    | Y    | S    |
| Chicken      | A | T | A | G | V               | L    | G    | E    | Y    | S    |
| X_tropicalis | - | - | A | G | V               | L    | G    | E    | Y    | A    |
| Zebrafish    | T | C | A | G | V               | V    | G    | E    | Y    | S    |

  

| Part of Exon 18 |      |      |      |      |      |      |      |      |
|-----------------|------|------|------|------|------|------|------|------|
| AP4E1           | S797 | K798 | V799 | K800 | E801 | A802 | K803 | S804 |
| Human           | S    | K    | V    | K    | E    | A    | K    | S    |
| Mouse           | S    | K    | L    | K    | V    | A    | Q    | S    |
| Dog             | S    | K    | V    | K    | E    | T    | K    | S    |
| Elephant        | S    | K    | V    | K    | E    | I    | K    | S    |
| Opossum         | S    | K    | V    | N    | D    | T    | K    | N    |
| Chicken         | S    | K    | V    | D    | K    | A    | Q    | N    |
| X_tropicalis    | S    | K    | I    | G    | G    | N    | K    | N    |

## Figure S1

Sequence conservation of Valine (V517) and Glutamic acid (E801) across different species.

**A**

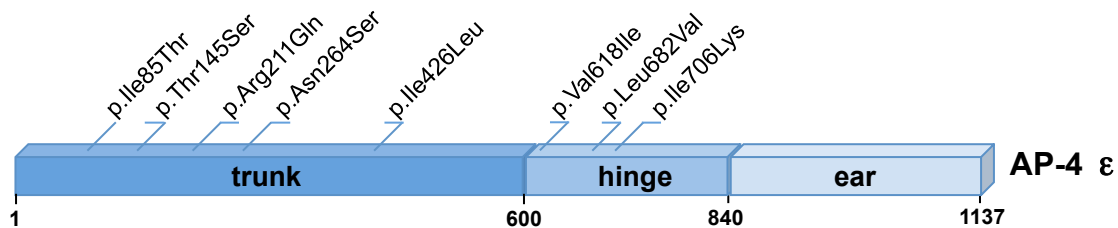

**B**

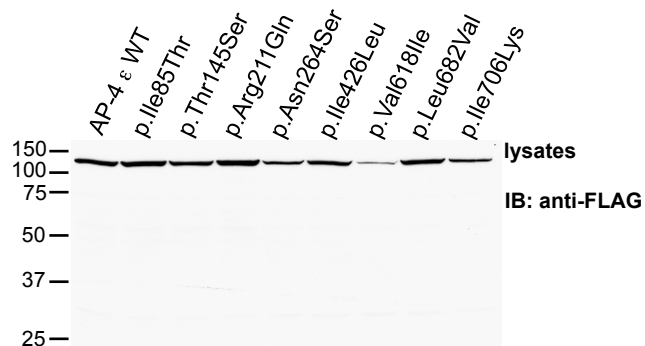

**C**

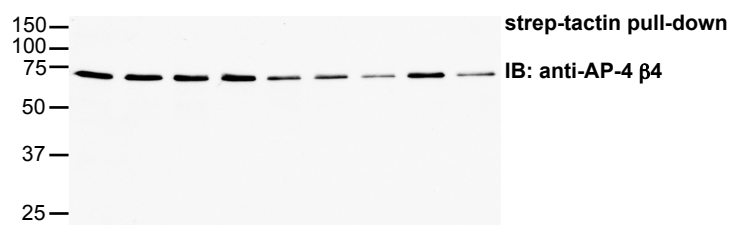

**D**

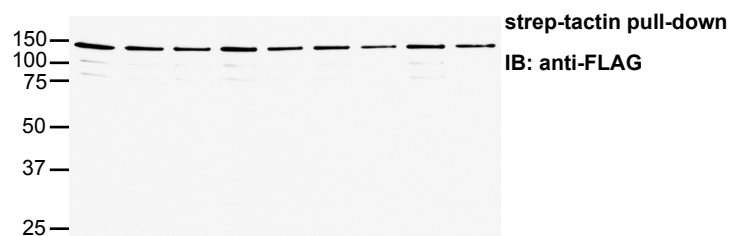

**E**

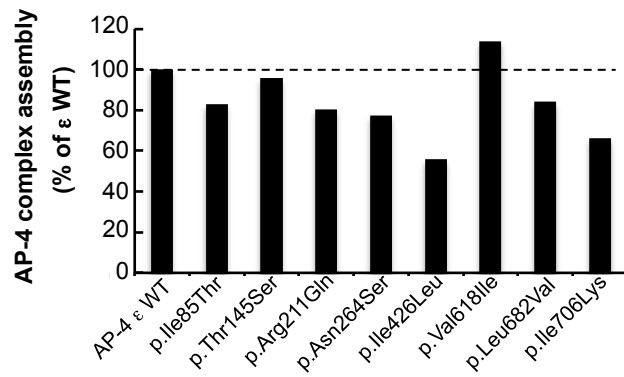

## FIGURE S2

### **Assembly of AP-4 complexes by rare non-synonymous AP-4 $\epsilon$ subunit variants identified in controls.**

(A) Schematic representation of the AP-4  $\epsilon$  subunit including trunk, hinge and ear domains and highlighting the non-synonymous  $\epsilon$  subunit variants identified in controls. The numbering in the scheme corresponds to the human AP-4  $\epsilon$  isoform comprising 1137 residues (accession number NP\_031373.2); assignment of domains is as in Boehm and Bonifacino 2001. (B) Expression of WT and variant human AP-4  $\epsilon$  constructs tagged at their N-termini with two Strep and one FLAG epitopes (TSF-tagged  $\epsilon$  constructs) in HEK293T cells. Cell lysates of transfected cells were subjected to SDS-PAGE followed by immunoblotting with anti-FLAG antibody. (C) Assembly of WT and variant TSF-tagged  $\epsilon$  constructs into AP-4 complexes. Lysates of transfected HEK293T cells were pulled-down with StrepTactin Sepharose beads, eluted with d-desthiobiotin and subjected to SDS-PAGE and immunoblotting with anti-AP-4  $\beta$ 4 antiserum (Dell'Angelica et al., 1999). (D) Immunoblot membranes with samples of the StrepTactin pull-down assays shown in panel C were stripped and subjected to additional immunoblotting with anti-FLAG antibody. (E) Assembly of AP-4 complexes by WT and variant constructs. Immunoblots shown in panels B and C were subjected to densitometric analysis using the Image J software. The assembly of AP-4 complexes by WT and variant  $\epsilon$  constructs (pulled-down complexes detected by anti- $\beta$ 4; blot in panel C) was calculated relative to the total expression of the cognate  $\epsilon$  constructs in transfected HEK293T cells (blot in panel B). Results were expressed as percentage of assembly measured for WT  $\epsilon$  (% of WT  $\epsilon$ ).

**Figure S3**  
**Sub-pedigree structure of Cameroonian stuttering family B.**

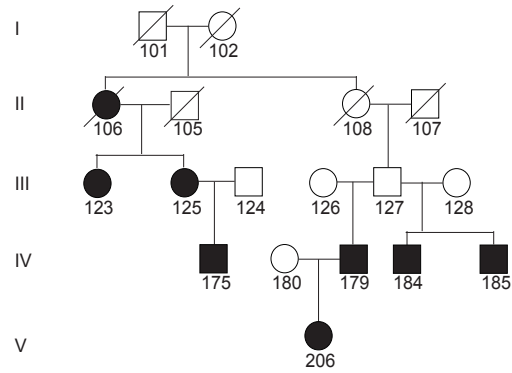

**Figure S3**  
**Sub-pedigree structure of Cameroonian stuttering family B.**

Individuals that were used for whole exome sequencing are III-125, IV-175 and IV-184.

**Table S1A:** Summary of rare *AP4B1* (NM\_001253852.1) variants in unrelated stuttering cases vs population matched controls

| cDNA change       | Amino acid change | SNP ID      | Unrelated stuttering cases (609) |            |          | Population matched controls (558) | Population databases |         |
|-------------------|-------------------|-------------|----------------------------------|------------|----------|-----------------------------------|----------------------|---------|
|                   |                   |             | STCR (93)                        | PKST (132) | NA (384) |                                   | 1000G                | ESP6400 |
| c.1-11C>T         | N/A               | Unknown     | -                                | PKST3      | -        | -                                 | -                    | -       |
| c.99C>G           | p.Ile33Met        | Unknown     | -                                | -          | NA351    | -                                 | -                    | -       |
| c.319C>T          | p.Arg107Trp       | rs74361335  | CAMST02                          | -          | -        | -                                 | (1)                  | (1)     |
| c.767C>T          | p.Thr256Ile       | rs143286419 | -                                | PKST10     | NA312    | (3)                               | (2)                  | (14)    |
| c.755T>C          | p.Val252Ala       | rs141417436 | -                                | PKSTR47    | NA147    | -                                 | (2)                  | (25)    |
| c.901C>T          | p.Arg301Cys       | Unknown     | -                                | PKSTR64    | -        | -                                 | -                    | -       |
| c.898G>T          | p.Val300Leu       | rs111785152 | -                                | -          | NA138    | (1)                               | (2)                  | (16)    |
| c.647C>A          | p.Aal216Asp       | Unknown     | -                                | PKST82     | 0        | -                                 | -                    | -       |
| c.1160_1161del2   | p.Thr387Argfs*30  | Unknown     | -                                | -          | NA167    | -                                 | -                    | (1)     |
| c.1318A>C         | p.Ile440Leu       | Unknown     | -                                | -          | NA208    | -                                 | -                    | -       |
| c.1460G>A         | p.Arg487Gln       | Unknown     | -                                | -          | NA217    | -                                 | -                    | (1)     |
| c.1727C>T         | p.Ser576Phe       | Unknown     | -                                | -          | NA70     | -                                 | -                    | -       |
| c.1747C>T         | p.Arg582Cys       | Unknown     | -                                | -          | NA163    | -                                 | -                    | -       |
| c.1843T>G         | p.Ser615Ala       | rs148748734 | -                                | -          | NA304    | -                                 | (1)                  | (4)     |
| c.2200A>G         | p.Ile734Val       | rs79050956  | -                                | -          | -        | -                                 | (1)                  | -       |
| c.305G>A          | p.Arg102Gln       | rs377192417 | -                                | -          | -        | (1)                               | -                    | (1)     |
| c.967T>A          | p.Ser322Thr       | rs149335605 | -                                | -          | -        | (1)                               | (2)                  | (6)     |
| c.1048G>C         | p.Glu350Gln       | Unknown     | -                                | -          | -        | (1)                               | -                    | -       |
| c.695A>G          | p.Glu232Gly       | Unknown     | -                                | -          | -        | (1)                               | -                    | -       |
| c.938G>A          | p.Ser313Asn       | Unknown     | -                                | -          | -        | (1)                               | -                    | -       |
| c.1180C>A         | p.Gln394Lys       | Unknown     | -                                | -          | -        | (1)                               | -                    | -       |
| c.1244G>A         | p.Cys415Tyr       | rs200590674 | -                                | -          | -        | (2)                               | -                    | (4)     |
| c.1510_1510+1del2 | p.Glu504Argfs*20  | Unknown     | -                                | -          | -        | (1)                               | -                    | -       |
| c.1497G>T         | p.Leu499Phe       | rs147573619 | -                                | -          | -        | (1)                               | -                    | (2)     |
| c.1679T>G         | p.Phe560Cys       | Unknown     | -                                | -          | -        | (1)                               | -                    | -       |

1000G = Genomes Data base ([www.1000genomes.org](http://www.1000genomes.org)), ESP6400 = Exome Sequencing Project Data base ([evs.gs.washington.edu/EVS/](http://evs.gs.washington.edu/EVS/)), CAMST02 = Cameroonian family, STCR = Cameroonian unrelated stuttering cases, PKST = Pakistani stuttering family probands, PKSTR = Pakistani unrelated stuttering cases, NA = Unrelated North American stuttering cases, - = Variants with zero allele frequency, () = Total number of individuals, N/A = Not applicable  
All annotations are based on human genome assembly hg19

**Table S1B:** Summary of rare *AP4M1* (NM\_004722.3) variants in unrelated stuttering cases vs population matched controls

| cDNA change | Amino acid change         | SNP ID      | Unrelated stuttering cases (609) |            |            | Population matched controls (558) | Population databases |         |
|-------------|---------------------------|-------------|----------------------------------|------------|------------|-----------------------------------|----------------------|---------|
|             |                           |             | STCR (93)                        | PKST (132) | NA (384)   |                                   | 1000G                | ESP6400 |
| c.77G>A     | p.Gly26Asp                | Unknown     | CAMST01                          | -          | -          | (7)                               | -                    | -       |
| c.220G>A    | p.Val74Ile                | Unknown     | -                                | PKSTR20    | -          | -                                 | -                    | (1)     |
| c.361T>C    | p.Tyr121His               | Unknown     | -                                | PKST27     | -          | -                                 | -                    | -       |
| c.742A>G    | p.Ile248Val               | Unknown     | 167,176,177                      | -          | -          | (1)                               | -                    | (2)     |
| c.740G>C    | p.Gly247Ala               | rs145887263 | -                                | -          | NA236, 242 | -                                 | -                    | (11)    |
| c.889C>T    | p.Arg297Trp               | rs199982051 | -                                | PKSTR18    | -          | -                                 | -                    | -       |
| c.953G>A    | p.Arg318Gln               | Unknown     | -                                | PKST75     | -          | -                                 | -                    | -       |
| c.1024A>G   | p.S342G (near splice)     | Unknown     | STCR119                          | -          | -          | -                                 | -                    | (1)     |
| c.1079C>A   | p.Ala360Asp               | rs145979929 | STCR120, CAMST01                 | -          | -          | -                                 | (2)                  | (9)     |
| c.1100G>A   | p.Arg367Gln               | rs139861201 | -                                | PKST31     | -          | (1)                               | -                    | (5)     |
| c.380C>T    | p.Thr127Met               | rs147261925 | -                                | -          | -          | (1)                               | -                    | (4)     |
| c.544-6T>G  | N/A (near splice)         | Unknown     | -                                | -          | -          | (1)                               | -                    | (10)    |
| c.803G>A    | p.Arg268Gln               | Unknown     | -                                | -          | -          | (1)                               | -                    | -       |
| c.908A>G    | p.Gln303Arg               | Unknown     | -                                | -          | -          | (1)                               | -                    | -       |
| c.930G>A    | p.Arg310Arg (near splice) | rs141754568 | -                                | -          | -          | (3)                               | -                    | (4)     |
| c.1357A>G   | p.Ile453Val               | Unknown     | -                                | -          | -          | (1)                               | -                    | -       |

1000G = Genomes Data base ([www.1000genomes.org](http://www.1000genomes.org)), ESP6400 = Exome Sequencing Project Data base ([evs.gs.washington.edu/EVS/](http://evs.gs.washington.edu/EVS/)), CAMST01 = Cameroonian family, STCR = Cameroonian unrelated stuttering cases, PKST = Pakistani stuttering family probands, PKSTR = Pakistani unrelated stuttering cases, NA = Unrelated North American stuttering cases, - = Variants with zero allele frequency, () = Total number of individuals, N/A = Not applicable  
All annotations are based on human genome assembly hg19

**Table S1C:** Summary of rare *AP4S1* (NM\_007077.4) variants in unrelated stuttering cases vs population matched controls

| cDNA change         | Amino acid change         | SNP ID      | Unrelated stuttering cases (609) |            |           | Population matched controls (558) | Population databases |         |
|---------------------|---------------------------|-------------|----------------------------------|------------|-----------|-----------------------------------|----------------------|---------|
|                     |                           |             | STCR (93)                        | PKST (132) | NA (384)  |                                   | 1000G                | ESP6400 |
| c.1-6A>G            | N/A (near splice)         | Unknown     | -                                | -          | NA362     | -                                 | -                    | (3)     |
| c.98C>G             | p.Thr33Arg                | Unknown     | -                                | -          | NA242     | -                                 | -                    | -       |
| c.228C>T            | p.Asn76Asn (near splice)  | rs144109125 | -                                | -          | NA52      | (1)                               | (1)                  | (4)     |
| c.295-3C>A          | N/A (near splice)         | rs185246578 | -                                | -          | NA24      | -                                 | (2)                  | -       |
| c.343C>G            | p.Gln115Glu               | Unknown     | -                                | PKSTR25    | -         | -                                 | -                    | -       |
| c.348G>A            | p.Met116Ile               | rs74807133  | -                                | -          | NA277     | -                                 | (8)                  | (2)     |
| c.367-11_367-10insT | N/A (near splice)         | Unknown     | -                                | -          | NA292,329 | (1)                               | -                    | (27)    |
| c.373A>G            | p.Ile125Val (near splice) | rs200969079 | -                                | -          | NA284     | -                                 | (1)                  | (3)     |
| c.430delG           | p.Gly144Aspfs*23          | Unknown     | -                                | -          | NA394     | (4)                               | -                    | -       |
| c.154T>C            | p.Tyr52His                | rs150801272 | -                                | -          | -         | (4)                               | -                    | (10)    |
| c.179G>A            | p.Arg60Gln                | Unknown     | -                                | -          | -         | (1)                               | -                    | (1)     |
| c.181C>G            | p.Gln61Glu                | Unknown     | -                                | -          | -         | (1)                               | -                    | -       |
| c.367-7T>G          | N/A (near splice)         | Unknown     | -                                | -          | -         | (1)                               | -                    | -       |
| c.418A>G            | p.Lys140Glu               | Unknown     | -                                | -          | -         | (1)                               | -                    | -       |
| c.407G>A            | p.Cys136Tyr               | Unknown     | -                                | -          | -         | (1)                               | -                    | -       |

1000G = Genomes Data base ([www.1000genomes.org](http://www.1000genomes.org)), ESP6400 = Exome Sequencing Project Data base ([evs.gs.washington.edu/EVS/](http://evs.gs.washington.edu/EVS/)), STCR = Cameroonian unrelated stuttering cases, PKST = Pakistani stuttering family probands, PKSTR = Pakistani unrelated stuttering cases, NA = Unrelated North American stuttering cases, - = Variants with zero allele frequency, () = Total number of individuals, N/A = Not applicable

All annotations are based on human genome assembly hg19



## **SUPPLEMENTAL REFERENCES**

Boehm, M., and Bonifacino, J.S. (2001). Adaptins: the final recount. *Mol. Biol. Cell* 12, 2907-2920.

Dell'Angelica, E.C., Mullins, C., and Bonifacino, J.S. (1999) AP-4, a novel protein complex related to clathrin adaptors. *J. Biol. Chem.* 274, 7278-85.

Image J, version 1.48v, Wayne Rasband, NIH, <http://imagej.nih.gov>)
